# Supplementary material for: Health-Related Quality of Life in Locally Advanced Gastric Cancer: A Systematic Review
Source: MDPI journal article supplement (doi:10.3390/cancers13235934), 2021-11-25
Supplement: s1 [file s1]

## Supplementary data

### Search strategy

**Table S1. Embase search:**

| No.                    | Query                                                                                                                                                                                                                                                                                                                                                                                                                                                                                                                                                                                                                                                                            | Results |
|------------------------|----------------------------------------------------------------------------------------------------------------------------------------------------------------------------------------------------------------------------------------------------------------------------------------------------------------------------------------------------------------------------------------------------------------------------------------------------------------------------------------------------------------------------------------------------------------------------------------------------------------------------------------------------------------------------------|---------|
| #5                     | #1 AND #2 NOT (#4 NOT #3)                                                                                                                                                                                                                                                                                                                                                                                                                                                                                                                                                                                                                                                        | 4394    |
| #4                     | 'palliative therapy'/exp OR 'palliative therapy' OR palliat* OR 'hospice'/exp OR hospice OR (((symptomatic OR supportive) NEAR/3 (treatment* OR therap* OR care)):ti,ab,kw)                                                                                                                                                                                                                                                                                                                                                                                                                                                                                                      | 284874  |
| #3                     | curat*:ti,ab,kw OR 'non metast*:ti,ab,kw OR nonmetast*:ti,ab,kw OR 'local advance*:ti,ab,kw OR 'locally advance*:ti,ab,kw OR current*:ti,ab,kw OR 'long term':ti,ab,kw OR longterm:ti,ab,kw OR 'stage 1':ti,ab,kw OR 'stage 2a':ti,ab,kw OR 'stage iia':ti,ab,kw OR 'life prolong*:ti,ab,kw OR 'life sustain*:ti,ab,kw                                                                                                                                                                                                                                                                                                                                                           | 3578324 |
| #2                     | 'patient-reported outcome'/exp OR 'patient reported outcome measure'/exp OR 'patient reported outcome measurement'/exp OR 'patient reported outcome questionnaire'/exp OR 'quality of life'/exp OR 'quality of life assessment'/exp OR ('patient reported':ti,ab,kw AND outcome*:ti,ab,kw) OR 'patient outcome assessment*:ti,ab,kw OR 'patient centered outcome*:ti,ab,kw OR 'patient centred outcome*:ti,ab,kw OR prom:ti,ab,kw OR proms:ti,ab,kw OR 'quality of life':ti,ab,kw OR hrqol:ti,ab,kw OR qol:ti,ab,kw OR (('self report*' NEAR/6 outcome*):ti,ab,kw) OR (((symptom* OR functioning OR 'self report*') NEAR/6 (surveillance OR supervision* OR monitor*)):ti,ab,kw) | 713150  |
| #1                     | 'stomach cancer'/exp OR 'stomach cancer' OR (((gastric OR stomach) NEAR/6 (neoplas* OR malignan* OR tumor* OR tumour* OR cancer* OR carcino* OR adenocarcino*)):ti,ab,kw)                                                                                                                                                                                                                                                                                                                                                                                                                                                                                                        | 183098  |
| <b>Medline search:</b> |                                                                                                                                                                                                                                                                                                                                                                                                                                                                                                                                                                                                                                                                                  |         |
| 1                      | exp Patient Reported Outcome Measures/ or Patient Outcome Assessment/ or Outcome Assessment, Health Care/ or Quality of Life/ or ("patient reported" and outcome*) or "patient outcome assessment*" or "patient centered outcome*" or "patient centred outcome*" or prom or proms or "quality of life" or hrqol or qol or ("self report*" adj6 outcome*) or ((symptom* or functioning or self-report*) adj6 (questionnaire* or construct* or interview* or scale* or instrument* or tool* or surveillance or supervision* or monitor*))):ti,ab,kf.                                                                                                                               | 540591  |
| 2                      | exp Stomach Neoplasms/ or ((gastric or stomach) adj6 (neoplas* or malignan* or tumor* or tumour* or cancer* or carcino* or adenocarcino*)):ti,ab,kf.                                                                                                                                                                                                                                                                                                                                                                                                                                                                                                                             | 137099  |
| 3                      | (curat* or "non metast*" or nonmetast* or "local advance*" or "locally advance*" or current or "long term" or longterm or "stage 1" or "stage 2a" or "stage iia" or "life prolong*" or "life sustain*"):ti,ab,kf.                                                                                                                                                                                                                                                                                                                                                                                                                                                                | 2251183 |
| 4                      | exp Palliative Care/ or exp Hospices/ or (palliat* or hospice or ((symptomatic or supportive) adj3 (treatment* or therap* or care))):ti,ab,kf.                                                                                                                                                                                                                                                                                                                                                                                                                                                                                                                                   | 157181  |
| 5                      | (1 and 2) not (4 not 3)                                                                                                                                                                                                                                                                                                                                                                                                                                                                                                                                                                                                                                                          | 2463    |

**Scopus search:**

(( TITLE-ABS ( ( ( gastric OR stomach ) W/6 ( neoplas\* OR malignan\* OR tumor\* OR tumour\* OR cancer\* OR carcino\* OR adenocarcino\* ) ) ) OR AUTHKEY ( ( ( gastric OR stomach ) W/6 ( neoplas\* OR malignan\* OR tumor\* OR tumour\* OR cancer\* OR carcino\* OR adenocarcino\* ) ) ) ) AND ( TITLE-ABS ( ( ( "patient reported" AND outcome\* ) OR "patient outcome assessment\*" OR "patient centered outcome\*" OR "patient centred outcome\*" OR prom OR prompts OR "quality of life" OR hrqol OR qol OR ( "self report\*" W/6 outcome\* ) OR ( ( symptom\* OR functioning OR self-report\* ) W/6 ( questionnaire\* OR construct\* OR interview\* OR scale\* OR instrument\* OR tool\* OR surveillance OR supervision\* OR monitor\* ) ) ) ) OR AUTHKEY ( ( ( "patient reported" AND outcome\* ) OR "patient outcome assessment\*" OR "patient centered outcome\*" OR "patient centred outcome\*" OR prom OR prompts OR "quality of life" OR hrqol OR qol OR ( "self report\*" W/6 outcome\* ) OR ( ( symptom\* OR functioning OR self-report\* ) W/6 ( questionnaire\* OR construct\* OR interview\* OR scale\* OR instrument\* OR tool\* OR surveillance OR supervision\* OR monitor\* ) ) ) ) ) ) AND NOT ((TITLE-ABS(palliat\* OR hospice OR ((symptomatic OR supportive) W/3 (treatment\* OR therap\* OR care))) OR AUTHKEY((palliat\* OR hospice OR ((symptomatic OR supportive) W/3 (treatment\* OR therap\* OR care)))))) AND NOT (TITLE-ABS(curat\* OR "non metast\*" OR nonmetast\* OR "local advance\*" OR "locally advance\*" OR current OR "long term" OR longterm OR "Stage 1" OR "stage 2a" OR "stage IIa" OR "life prolong\*" OR "life sustain\*") OR AUTHKEY((curat\* OR "non metast\*" OR nonmetast\* OR "local advance\*" OR "locally advance\*" OR current OR "long term" OR longterm OR "Stage 1" OR "stage 2a" OR "stage IIa" OR "life prolong\*" OR "life sustain\*") ) ) ) )
